# Supplementary material for: Phylogenetic relationships of sucrose transporters (SUTs) in plants and genome-wide characterization of SUT genes in Orchidaceae reveal roles in floral organ development
Source: PeerJ. 2021 Sep 13;9:e11961. doi: 10.7717/peerj.11961 (PMC8445082; doi:10.7717/peerj.11961)
Supplement: Supplemental Information 1 [file peerj-09-11961-s001.xlsx]

## Sheet: SUT
Phylogenetic relationships of sucrose transporters (SUTs) in plants and genome-wide characterization of SUT genes in Orchidaceae Yunzhu Wang1, Yue Chen1, Qingzhen Wei2, Hongjian Wan2, Chongbo Sun1* 1Institution for all authors: Institute of Horticulture Research, Zhejiang Academy of Agricultural Sciences, Hangzhou 310021, China. 2Institution for all authors: Institute of Vegetable Research, Zheji…
Table S1 Protein sequence of the 22 SUTs from A. shenzhennica, D. officinale, and P. equestris
Species	No.	Name	Protein sequence
Apostasia shenzhennica	1	AsSUT01	MVDANDNVVSAEAQNAEPLRRLAILGYGAGHMLNDITSACWFTYLLLFLTDLGLSPRHAAIVMLSGQIADAFATIFVGELIDRFGHFKLWHAGGSILVAISFSSVFGGCLPCKIFGINSSVLQTIGYSIFAAIFNVGWAVTQVSHMSMVNCITLNPISRVALVSCRNAYTMVANLSLYAVALVVFSIYSGKTYTDIKLEYRWIAYLSIFLGGCFVCIFLIGTKEPEMRHQSRCKNFSKISWNYWFRKVLYYQVALIYVLTRLVTNVSQALLAFYVINDLGMPQSSKALVPAIIYVCSFIVSVTLQEISWSGSRLKAFFTVGALLWIFSGAGIFILPSSLRNIIYILSITIGIANALMMVTGISMQSILVGEDLNGCGFVYGSLSFLDKLSCGLALYALE…
	2	AsSUT02	MADSPKERTRPASSRGRPPSSLSSTALAASTSGKERLHKARPPPPPPPPPPPPRKGARIPLRLLLKVTSVACGVQFGWALQLSLLTPYVQELGIPHSMASFVWLCGPLSGLLVQPLVGHLSDRCTSRMGRRRPFIIGGAGVIAFAVLLIGYAADIGGILGDAADAVIRPRAIAVFVVGFWLLDVGNNTIQGPCRALLADLTGKDHRRTRVANAYFSLFMALGSVLGYAAGSFSGWFEILPFTHTSACNTNCANLKSVFLVDIVLLALTTYISVSSVKEVSLSSESASNHDEETPAQEAFFWELLGVFRYVNLPIWIILTVTALNWIGWFPFTLFDTDWMGREIYRGDPNGGNNYHNGVRMGAFGLMLNSIVLGVTSVMLEKLCRKLGSGLVWGISSILL…
	3	AsSUT03	MEGALSIRVPYRHLNAAELELVDFSGEIDDRDDGRASTSLPDSADSPSSSRQFDSPTSLPRVNQRSSLKTLILGSMIGAGVQFGWALQLSLLTPYIQTLGIEHTFSSFIWLCGPLTGFIVQPCVGVWSDKCDSKYGRRRPFIVAGCMMISLAVFLIGFASDIGYHLGDSHEHCKSYKGPRWRAAAVFIFGFWMLDLANNTVQGPARALLADLSGPDQRNSANAIFCCWMALGNILGFSSGANGSWHRVIGVIYDEYMLWWHLFETGSLESLSPLLNRDCLSGVRRCCLYDSKDLYDFLFSSQIFLMFCMLVTIYFAKEVPLEVKTIRRMSDSAPLLNDNLRNPKEVPVKMKPAHAISDSSPLLKDTHQNGFVFPATTLERTDAGQNSERNVVIVESNYG…
	4	AsSUT04	MVYYKVSMVGRQPDISLARFIFTGMVAGGVQYGWALQLSLLTPYVHTLGIPHSLASIMWLFGPISGFVVGPTIGLWSDRCKSSLGRRRPFILAGCLVICLSVLGSVVNEYSTYFGPQWKAAIIFVVGFCILDISNNVVQGPARAMMADLSGKHGCRAGNIIYAFWMAAGNILGYSSGASANWHKWLPVLVTNSCCEACANLKGAFLVAVVFLVFCLMVTLICAKEVPLSELYEEVSYGNSGLLSIIKAFKELPAGMPQVFVLTSLSWLAWFPFLLYNTDWVGREIYHGDLNGTKAEIDSYNKGVQIGAFGLLLNSVIHGISSVLLEPMCSKFSSRIVWVIGNFTLFVAMVAVAVLSVISTNAYTSGSITSAVSGPDGIKIGALAIFAALGFPLAILYSI…
	5	AsSUT05	MVAGGVQYGWALQLSLLTPYVQTLGLSHALSSLMWLCGPVAGFVVQPCVGLWSDRCSSRFGRRRPFILAGCLLICFAVIVIGFSSDIGYKLGDTKEDCSVYHGPRWRAAVVYVVGFWMLDLSNNAVQGPARALMADLSGPHGCNKANAIFATWMAVGNILGYSSGASGKWHTWLPFLSSRACCEACANLKGAFLVAVVFLLCCVFVTLTVAREVPLPSVKGTNEVAEQRVGIMVLFKSFKNLPPGMPYVLLVTSLTWLSWFPFILYDTDWMGREVYHGNPKGTPAEIKAYDNGVRAGAFGLLINSVVLGVTSFMIEPLCRKFTPRIVWVMSNFFVFACMAATAIISTWSLHTYHGSIQDAIITPDGRVRAAAIVVFAALGVPLAVLFSVPFAVTAQLAA…
	6	AsSUT06	MGYNKGSVVGSQPDISLLRFIFTGMVAGGVQYGWALQLSLLTPYVQTLGLPHSLASIMWLCGPIAGFVVGPTVGLWSDRCKSSFGRRRPFILAGCLIICIAVLVIGFSSDIGTALGDTKENCSIYVGPRWKAALIYVVGFWVLDFSNNAVQGPARAMMADLSGKHGYSAGNIIYAGWMAFGNILGYSSGASGGWHKWFPFLLTKSCCEDCANLKGAFLVAVVFLGLCLMVTLFCAKEVPLSELDVEISEENSGFFSVFKAFKNLPAGMPQVLVVTCLTWLAWFPFILYDTDWMGREIYHGDPSGTKAEIDSFNKGVQEGAFGLLLNSILLGISSILLEPMCRKFSTRVVWVIGNFTLFLAMVAITVLSVISTNSYTGSISAAVSGPEGIKIGALAIFTA…
Dendrobium officinale	7	DoSUT01	MVDAIHDELPARAQNAEPLRRLEILVYGAGHMLNDITSACWFTYLLLFLTDLGLSPRDAAIVMLSGQVADAFTTIFAGELIDRFGHFKKWHAGGSILVAISFSSVFGGCLPCKIIGKNSSTLQTIGYSLFAAIFNVGWAVTQVSHMSMVNCITLNPTSRVALNSCRNAFTMVANLSLYAFALVVFSVYNAKAYDGIKLEYRWIAYMSIFMGCCFVVVFLIGTKEPALKQRRHSESFSKISWNYWFKKALYYQVAIVYVLTRLITNVSQALLAFYVIDDLGMPQSSKALVPAIIYISSFIVSVILQEISWTSSRLKVSYTSGAILWILSGSGIFVLPSSLHSSMYIFSVIIGIANALMMVTGISMQSMLIGKDLNGCGFVCGSLSFMDKLSCGLALYALE…
	8	DoSUT02	MDGAVSIRVPYRHLNEAELELVELVGEIEDRNTGGAPTRLLVSDSSPSSSTHFDYSASQSGGRQGSSLKTLIFGSMVGAGVQFGWALQLSLLTPYIQTLGIEHAFSSFIWLCGPITGFIVQPCVGVWSDKCNSKYGRRRPFIVVGCMMITLAVLFIGFAADIGYLLGDTQENCDKYKGPRWRASAVFIFGFWMLDLANNTVQGPARALLADLSGPEQRSLANAIFCSWMAVGNILGFSSGASGNWHSALERRARELETLGIEHAFSSFIWLCGPITGFIVQPCVGVWSDKCNSKYGRRRPFIVVGCMMITLAVLFIGFAADIGYLLGDTQENCDKYKGPRWRASAVFIFGFWMLDLANNTVQGPARALLADLSGPEQRSLANAIFCSWMAVGNILGFSS…
	9	DoSUT03	MSDPPHELTGTQPPPAKSRPRSSLSSAAEVATTSGRDRIKKSRPPPPPPPPPPPRREARVPLRLLLQVTVVASGVQFGWALQLSLLTPYVQELGIPHSFASFVWLCGPLSGLFVQPLVGVMSDRCYSKLGRRRPFIIGGAAVIAVSVLLIGHAADIGGILGDPADAVVRPRAIAIFVVGFWLLDVGNNTIQGPCRALLADLTGSSSYPPLSISSGA
	10	DoSUT04	MSDPPHELTGTQPPPAKSRPRSSLSSAAEVATTSGRDRIKKSRPPPPPPPPPPPRREARVPLRLLLQVTVVASGVQFGWALQLSLLTPYVQELGIPHSFASFVWLCGPLSGLFVQPLVGVMSDRCYSKLGRRRPFIIGGAAVIAVSVLLIGHAADIGGILGDPADAVVRPRAIAIFVVGFWLLDVGNNTIQGPCRALLADLTGSSSYPPLSISSGA
	11	DoSUT05	MELTGARISVPNNVATTAPKPISLVRLFFSCMVAGGVQYGWALQLSLLTPYVQTLGLSHALSSLMWLCGPVAGFVVQPCVGLWSDRCRSRFGKRRPFILVGCLLISSAVIVIAFSSDIGYKLGDTKEHCSVYHGPRWRAAFVFVAGFWMLDLSNNAVQGPARALMADLSGPHGCNAANAIFASWMAIGNILGYSSGASGEWHKWIPFLSNKACCEACANLKGAFLVAVVFLIFSVMVTFVVAKEEPLPSIKGRIEAAEDRVGIMDIFKSIKNLPPGMPSVLLVTSLTWLSWFPFILYDTDWMGREVFHGNPKGTPAQMKAYNDGIRAGAFGLLINSVQPCVGLWSDRCRSRFGKRRPFILVGCLLISSAVIVIAFSSDIGYKLGDTKEHCSVYHGPRWR…
	12	DoSUT06	MQTLGLSHALASIMWLCGPVAGLVVGPTVGFLSDRCNSSFGRRRPFILTGCIIICLSVLVIGYSSDIGAALGDTKESCSTYIGPRWKAAIIYVVGFWVLDFSNNAVQASKHGCSTGNIIYAFWMAVGNILGYSSGASGAWHKWLPFLMTNSCCEACANLKGAFLVAVVSLIGFRTNV
	13	DoSUT07	MERVVLAGGGEALATLEYKAAAAAAAGKQISLVRLIFSCMVAGGVQYGWALQLSLLTPYVQTLGLSHTLSSLIWLCGPVAGFVVQPCVGLWSDRCRSRFGRRRPFILVGCIFICFAVIVIAFSSDIGYKLGDTKEDCSIYHGPRWRAAIVYVAGFWLLDLSNNTVQGPTRALMADLSGKLYHGPRWRAAIVYVAGFWLLDLSNNTVQGPTRALMADLSGKLTVFLLLSVLVTSIAGREEVAPSTVEERVGIMEIFRTIKNLPPKMPYILLVTSLTWLSWFPFNLYDTDWMGREIFHGDPKGTPAQMKAYDNGVRAGALGLLINSVVLGVTSILIEPLCRKFTTRIVWVMCNFCMFICMAATAIISSWSVHSYHGSIHDAIISPDGSVKAVALVVFAVLG…
	14	DoSUT08	VQYGWALQLSLLTPYVQTLGLPHSLASIMWLCGPIAGFVVGPTIGMWSDRCGSRFGRRKPFILAGCFIICCAVMVIGFSSDIGSALGDTKENCSTYVGPRWKAALIYVVGFWVLDFSNNAVQGPARAMMADLSGSHGCSTGNIIYAFWMAFGNILGYASGASGSWHKWFPFLMTNSCCEACANLKGAFLIAVIFLGICLAITLISAKEVPLSELDAEASKENSGFFFVFKAFKNLPSGMLSVLLMTSLTWMAWFPFILYDTDWMGREIYHGDPNGTKEEIEAFNKGVQQGAFGLLLNSIVLGITATLLEPMCRKFSSRVVWVIGNFTLFLAMVAITVLSAISNKSFTGSISTAVRGPDGIKIGALAIFTALGFPLAILYSIPFATAAQLVANEGSTQQG…
Phalaenopsis equestris	15	PeqSUT01	MAIMVDAKHDEVSARAEHAEPLGRLAILGYGAGHMLNDITSACWFTYLLLFLTDLGLSPRDAAIVMLSGQVADAFTTIFAGVLIDRFGHFKLWHGGGSILVAISFSSVFGGCLPCKIIGNNSFTLQTIGYSLFASIFNVGWAVTQVSHMSMVNCITLNQTTRVSLTSCRNAFTMVANLSLYAVALAVFNMYDAKAYADIKSEYRWIAYLSIFMGCCFVVVFLVATKEPTLKQRRECESFSKISWNFWFKKALYYQVAIVYVLIRLVTNVSQALLAFFVINDLGMPQSAKALVPAIIYISSFIVSVILQEISWNSSRLKATFTSGAVLWILSGSAIFVLPSSLHSTMYILSIIIGVANALMMVTGISMQSMLVGKDVNGCGFVYGSLSFLDKLSCGLALY…
	16	PeqSUT02	MVAGGVQFGWALQLSLLTPYVQTLGLPHHLASISWLCGPISGLVIAPTVGLLSDRCRLRFGRRRPFIVAGCIIVCFAVLLIGFSSDIGSAFGDTKENCSTYIGPRWKAAVVCIVGFWVLDFGNNLIQSPTRAMMGDLSGKHGCNAANIIFAFWMAFGNILGFSSGSIWSWHKWFPSLMTNACCEACANLKGAFLVAVVSSSFPRLITLQFLFVLKSLFFHLFVVFKLISCHLGFPNKVMV
	17	PeqSUT03	MDGSVSIRVPYRHLNEAELELIEFDGEIEERKTGRTPTTLSVSGSQPSSFAHFDNPTSQSGGRQGSGLKTLIFGSMVGAGVQFGWALQLSLLTPYIQTLGIEHAFSSFIWLCGPITGFVVQPCVGVWSDKCDSKYGRRRPFIVAGCIMITLAVSFISFAADIGYLLGDTQEDCHKYKGPRWRASAVFIFGFWMLDLANNTVQGPARALLADLSGPDQRNLANAIFCSWMAVGNILGFSSGASGNWHRLFPFLATRACCEACVNLKVAFLVAVAFLMFCMLVTIYYAKEVPLEVTRPVRLLSDSAPLLRETEQNGLVLPNKTFEMGDVGQNYENNAGVYKADHGDISLFNSNVEKDEIEAFKNGPSAVLVNILTSLRHLPPGMHSVLIVMALSWLSWFPF…
	18	PeqSUT04	MGSEDEVQDRRQPDISLVRLIFCCTVAGGVQYGWALQLSLLTPYVQTLGLPHALASIMWLCGPVAGFIVGPTVGFFSDRCNSSFGRRRPFILTGCLIICLSVMVIGYSSDIGTALGDTKENCSTYVGPRWKAALIYVIGFWVLDFSNNAVQGPARAMMADLSGKHGCSAGNIIYAFWMALGNVLGYASGASGAWHKLMPFLMTNSCCESCANLKGAFLVAVIFLGLCLTVTLICAKEVPLSQLDANVLQQNSGFFSVFKAFKNLPTGMPSVLLVTCLTWLAWFPFILYNTDWMGREIYHGDPSGTKYEIEAYNKGVQQGAFGLLLNSILLGITSILLEPMRRKITTRFVWVIGNFTLFLGMVAMTVLSLISTHGYKTKLSYVANGEEGIKIGALAIFTI…
	19	PeqSUT05	MDSGEGSEISERPQISLKRLIFACTVAGGVQYGWALQLSLLTPYIQTLGLPHALASIMWLCGPVAGFVVGPSIGYWSDKCRSKFGRRRPFILSGCLLICCCVLLIGFSSDIGSALGDTKENCSTYVGPRWKAAIIYVVGFWVLDFSNNAVQGPARAMMADLSGKHGCNAANLIYAFWMAFGNILGYSSGSTGSWHKWFPFLLTNSCCATCANLKAAFLVAIVFLLICLTVTLFAAKEVPLCELEPSEAAQGGSAIFSIFKTFKSLPAGMPSVLIVTALTWLAWFPFILYDTDWMGREIYHGDPSGTKQEIDTYNKGVEEGAFGLLLNSLVLAITSMVLGPLCRKFTSKVVWITGNFILFLGMAAITVLSVISTNAYSGKINSAVAGPDGVKLGALAIFT…
	20	PeqSUT06	MTTTKPISLVRLFFSCMVAGGVQYGWALQLSLLTPYVQTLGLSHALSSLMWLCGPVAGFVVQPCVGLWSDRCHSRFGKRRPFILVGCLLISTAVIVIAFSSDIGFKLGDTKEHCSVYHGPRWRAAFVFVAGFWMLDLSNNAVQGPARALMADLSGHHGTNAANAIFAAWMAIGNILGYSSGASGEWHKWLPFLSNKACCEACANLKGAFLVAVVFLIICVMVTFVVAKEVPLPSVKGSTEAEDDRVGIMDIFKSIKNLPQGMPSVLLVTSLTWLSWFPFILYDTDWMGREVFHGSPKGTPAQMKAYNDGIRAGAFGLLLNSVVLGVTSFLVEPMCRKFTPRIVWVSSNFFVFICMAATAIISTWSLHTYHGNIQDVIITPDGKVKAVALFVFSVLGVPL…
	21	PeqSUT07	AAAVGKPISLLRLFFSCMVAGGVQYGWALQLSLLTPYVQTLGLSHTLSSLIWLCGPVAGFVVQPCVGLWSDRCPSRLGRRRPFILVGCLLICLAVFVIAFSSDIGYKLGDTHEDCSIYHGPRWKAAIVYVAGFWMLDLSNNTVQGPTRAFMADLCGQHGWSAANAIFASWMAIGNILGYSSGASGKWHQWFPFLSSRACCEACANLKGAFLVAVVFLLLSVTVTLIVGKEVAARPSTDEETFGLIAIFKTVKNLPPGMPYVLLVTALTWLSWFPFILYDTDWMGREIYHGDPKGTTAQMKAYENGVRAGALGLLINSVVLGVSTMLIEPMCRKFTPRIVWVMGNFSVFACMAATTIISSWSLRSYHGNVQDAFISPDGRVKAAALIVFAVLGAPLAVLY…
	22	PeqSUT08	MSDRCASKMGRRRPFIIGGAAVIALSVILIGHAADIGAIFGDPVDALIRPRAIAIFVVGFWLLDVGNNTIQGPCRALLADLTGKDHRRTRVANAYYSLFMALGSIFGYAAGAFSGWFKILPFTVTKVCSTNCANLKSVFLIDVVLLVLTTYVSISSVKEVPLSSTASSYPDEETPAQEAFFWDLLGVFRFITLPIWIILIVTALNWIGWFPFTLFDTDWMGREIYRGDPNGGQSYHAGVRMGAFGLMLNAIVLGFTSVMLEKLCKKLGSGLVWGISSIILSFCLGAMLIITAVLNSMEIPSTAPPPTGIVVAALIVFTILGAPLAITYSLPYALISARIEALGLGQGLAMGVLNLAIVIPQIIVSLGSGPWDQLFGGGNSPAFAVGAASAFFAGLGAIV…
