# Supplementary material for: Phylogenetic relationships of sucrose transporters (SUTs) in plants and genome-wide characterization of SUT genes in Orchidaceae reveal roles in floral organ development
Source: PeerJ. 2021 Sep 13;9:e11961. doi: 10.7717/peerj.11961 (PMC8445082; doi:10.7717/peerj.11961)
Supplement: Supplemental Information 2 [file peerj-09-11961-s002.xlsx]

## Sheet: raw_data
Phylogenetic relationships of sucrose transporters (SUTs) in plants and genome-wide characterization of SUT genes in Orchidaceae Yunzhu Wang1, Yue Chen1, Qingzhen Wei2, Hongjian Wan2, Chongbo Sun1* 1Institution for all authors: Institute of Horticulture Research, Zhejiang Academy of Agricultural Sciences, Hangzhou 310021, China. 2Institution for all authors: Institute of Vegetable Research, Zheji…
Table S2 FPKM expression of DoSUT genes in four different tissues of D. officinale
t_name	strand	start	end	num_exons	length	gene_id	gene_name	GO	Description	FPKM.F1	FPKM.F2	FPKM.F3	FPKM.Y1	FPKM.Y2	FPKM.Y3	FPKM.G1	FPKM.G2	FPKM.G3	FPKM.J1	FPKM.J2	FPKM.J3	Flower	Leaf	Root	Stem
XM_020822112.1	-	93003	98044	14	1728	110096257	LOC110096257	GO:0005364(maltose:proton symporter activity);GO:0008506(sucrose:proton symporter activity);GO:0009846(pollen germination);GO:0015768(maltose transport);GO:0015770(sucrose transport);GO:0042950(salicin transmembrane transporter activity)	PREDICTED: Dendrobium catenatum sucrose transport protein SUT1-like (LOC110096257), mRNA	3.41094	2.94947	1.52947	0.0001	0.0001	0.0001	0.0001	0.0001	0.0001	0.0001	0.0001	0.0001	2.62996	0.0001	0.0001	0.0001
XM_020830372.1	+	263885	277996	13	2115	110102172	LOC110102172	GO:0003674(molecular_function);GO:0008150(biological_process);GO:0016021(integral component of membrane)	PREDICTED: Dendrobium catenatum major facilitator superfamily domain-containing protein 12-like (LOC110102172), transcript variant X1, mRNA	8.47832	8.68352	8.36483	0.370328	0.491089	0.342856	2.01025	1.45995	2.38295	2.34054	1.05866	1.19469	8.50889	0.401424	1.95105	1.5313
XM_020841859.1	+	69380	73609	14	1853	110110403	LOC110110403	GO:0005364(maltose:proton symporter activity);GO:0008506(sucrose:proton symporter activity);GO:0009846(pollen germination);GO:0015768(maltose transport);GO:0015770(sucrose transport);GO:0042950(salicin transmembrane transporter activity)	PREDICTED: Dendrobium catenatum sucrose transport protein SUT1-like (LOC110110403), mRNA	0.376158	0.189287	0.198371	0.0001	0.0001	0.0001	0.0001	0.0001	0.0001	0.0001	0.0001	0.135622	0.254605	0.0001	0.0001	0.045274
XM_020843136.1	+	321474	330880	14	2065	110111323	LOC110111323	GO:0005364(maltose:proton symporter activity);GO:0008506(sucrose:proton symporter activity);GO:0009846(pollen germination);GO:0015768(maltose transport);GO:0015770(sucrose transport);GO:0042950(salicin transmembrane transporter activity)	PREDICTED: Dendrobium catenatum sucrose transport protein SUT1-like (LOC110111323), mRNA	228.888	230.667	233.609	61.9028	52.878	54.3959	37.575	37.9691	30.0027	268.909	275.893	258.455	231.055	56.3922	35.1823	267.752
XM_020844755.1	-	73196	89405	5	1700	110112502	LOC110112502	GO:0009705(plant-type vacuole membrane)	PREDICTED: Dendrobium catenatum sucrose transport protein SUT2 (LOC110112502), transcript variant X4, mRNA	0.601693	0.508611	0.488065	1.2416	0.095454	1.43195	4.32201	0.956068	3.46208	1.68603	1.86821	0.568488	0.53279	0.923003	2.91339	1.37424
XM_020847144.1	+	374406	383474	14	1771	110114304	LOC110114304	GO:0005364(maltose:proton symporter activity);GO:0008506(sucrose:proton symporter activity);GO:0009846(pollen germination);GO:0015768(maltose transport);GO:0015770(sucrose transport);GO:0042950(salicin transmembrane transporter activity)	PREDICTED: Dendrobium catenatum sucrose transport protein SUT1-like (LOC110114304), mRNA	8.15893	9.21528	5.97858	0.0001	0.0001	0.0001	0.048579	0.0001	0.0001	0.0001	0.0001	0.0001	7.78426	0.0001	0.0162597	0.0001
XM_020848310.1	+	248196	267538	14	2298	110115165	LOC110115165	GO:0005351(sugar:proton symporter activity);GO:0005794(Golgi apparatus);GO:0005886(plasma membrane);GO:0005887(integral component of plasma membrane);GO:0005985(sucrose metabolic process);GO:0008506(sucrose:proton symporter activity);GO:0008515(sucrose transmembrane transporter activity);GO:0009611(response to wounding);GO:0015144(carbohydrate transmembrane transporter activity);GO:0015293(sympor…	PREDICTED: Dendrobium catenatum sucrose transport protein SUT4-like (LOC110115165), mRNA	8.0519	9.115	8.11909	9.64758	8.95568	9.37987	8.10506	8.62948	8.97474	6.22354	5.89689	7.28621	8.42866	9.32771	8.56976	6.46888

## Sheet: SUT-RNA-Seq
ID	gene_Id	Flower	Leaf	Root	Stem
DenSUT01	XM_020830372.1	8.50889	0.401424	1.95105	1.5313
DenSUT02	XM_020848310.1	8.42866	9.32771	8.56976	6.46888
DenSUT03	XM_020844755.1	0.53279	0.923003	2.91339	1.37424
DenSUT04	XM_020844755.1	0.53279	0.923003	2.91339	1.37424
DenSUT05	XM_020843136.1	231.055	56.3922	35.1823	267.752
DenSUT06	XM_020822112.1	2.62996	0.0001	0.0001	0.0001
DenSUT07	XM_020841859.1	0.254605	0.0001	0.0001	0.045274
DenSUT08	XM_020847144.1	7.78426	0.0001	0.0162597	0.0001
