# Supplementary material for: Phylogenetic relationships of sucrose transporters (SUTs) in plants and genome-wide characterization of SUT genes in Orchidaceae reveal roles in floral organ development
Source: PeerJ. 2021 Sep 13;9:e11961. doi: 10.7717/peerj.11961 (PMC8445082; doi:10.7717/peerj.11961)
Supplement: Supplemental Information 3 [file peerj-09-11961-s003.xlsx]

## Sheet: primer
Phylogenetic relationships of sucrose transporters (SUTs) in plants and genome-wide characterization of SUT genes in Orchidaceae Yunzhu Wang1, Yue Chen1, Qingzhen Wei2, Hongjian Wan2, Chongbo Sun1* 1Institution for all authors: Institute of Horticulture Research, Zhejiang Academy of Agricultural Sciences, Hangzhou 310021, China. 2Institution for all authors: Institute of Vegetable Research, Zheji…
Table S3 Primer sequences used in qRT-PCR
Primer Name	Primer Sequence	Fragment size
DcACTIN-F	GATTTGCTGGTGACGATGC	136
DcACTIN-R	AGGATACCTCTTTTGGACTGG
DoSUT01-F	GCTGGGGCTCATTCCTTCTT	81
DoSUT01-R	TCCGAATGGGTTTCTTCCAGT
DoSUT02-F	CGACCAACGGCGAAAATTGA	73
DoSUT02-R	CGGAAAAGGGAGAGGTGAGG
DoSUT03-F	CCACCGACTGGCATAGTTGT	185
DoSUT03-R	CTGCTTTTGCATTACTGAGGGA
DoSUT04-F	CCACCGACTGGCATAGTTGT	185
DoSUT04-R	CTGCTTTTGCATTACTGAGGGA
DoSUT05-F	AGCCCCTCTAATGATGTGGT	134
DoSUT05-R	AGGAGAGGGGGCCTGTTAAG
DoSUT06-F	TGCGCTGGCTTCTATCATGT	195
DoSUT06-R	TCACCCAATGCTGCTCCAAT
DoSUT07-F	GCAGTTTGCACTGAGAAGCC	87
DoSUT07-R	TTATCTCTCGCCACCCATCG
DoSUT08-F	GTGGCTTTGTAGGTCTGGCT	129
DoSUT08-R	GGACTCTCATTCCCCACCCT

## Sheet: raw data for primer
ID	Primer name	Sequence (from 5' to 3')	Source	Target fragment length
DcACTIN	DcACTIN-F	GATTTGCTGGTGACGATGC	https://doi.org/10.1186/s12870-020-2244-6	136
	DcACTIN-R	AGGATACCTCTTTTGGACTGG
DoSUT01	30372.1-F	GCTGGGGCTCATTCCTTCTT	XM_020830372.1	81
	30372.1-R	TCCGAATGGGTTTCTTCCAGT
DoSUT02	48310.1-F	CGACCAACGGCGAAAATTGA	XM_020848310.1	73
	48310.1-R	CGGAAAAGGGAGAGGTGAGG
DoSUT03	44755.1-F	CCACCGACTGGCATAGTTGT	XM_020844755.1	185
	44755.1-R	CTGCTTTTGCATTACTGAGGGA
DoSUT05	43136.1-F	AGCCCCTCTAATGATGTGGT	XM_020843136.1	134
	43136.1-R	AGGAGAGGGGGCCTGTTAAG
DoSUT06	22112.1-F	TGCGCTGGCTTCTATCATGT	XM_020822112.1	195
	22112.1-R	TCACCCAATGCTGCTCCAAT
DoSUT07	41859.1-F	GCAGTTTGCACTGAGAAGCC	XM_020841859.1	87
	41859.1-R	TTATCTCTCGCCACCCATCG
DoSUT08	47144.1-F	GTGGCTTTGTAGGTCTGGCT	XM_020847144.1	129
	47144.1-R	GGACTCTCATTCCCCACCCT
