# Supplementary material for: Phylogenetic relationships of sucrose transporters (SUTs) in plants and genome-wide characterization of SUT genes in Orchidaceae reveal roles in floral organ development
Source: PeerJ. 2021 Sep 13;9:e11961. doi: 10.7717/peerj.11961 (PMC8445082; doi:10.7717/peerj.11961)
Supplement: Supplemental Information 4 [file peerj-09-11961-s004.xlsx]

## Sheet: sheet1
Phylogenetic relationships of sucrose transporters (SUTs) in plants and genome-wide characterization of SUT genes in Orchidaceae Yunzhu Wang1, Yue Chen1, Qingzhen Wei2, Hongjian Wan2, Chongbo Sun1* 1Institution for all authors: Institute of Horticulture Research, Zhejiang Academy of Agricultural Sciences, Hangzhou 310021, China. 2Institution for all authors: Institute of Vegetable Research, Zheji…
Table S4 Relative expression for eight DoSUTs in flowers, roots, and stems in D. officinale using qRT-PCR
Gene name	Relative expression levels
	Flower		Leaf		Stem
DoSUT01	0.733736	1.04a	0.0843969	0.16b	0.0996721	0.1c
	0.775572		0.136156		0.113702
	0.775572		0.167628		0.137103
	0.884745		0.150031		0.104627
	1.15136		0.180909		0.0898295
	0.831238		0.121863		0.0873731
	1.25992		0.192554		0.109071
	1.217		0.230579		0.0782011
	1.74513		0.206374		0.0787451
DoSUT02	0.762249	1.03a	0.32722	0.48b	0.726147	0.99c
	0.925518		0.383775		0.951538
	0.751754		0.513463		1.33638
	—		0.341116		1.37395
	—		0.531571		1.10829
	—		0.318272		1.13158
	1.116		0.731198		0.828362
	1.30888		0.538991		0.80571
	1.29086		0.658992		0.686977
DoSUT03	0.808508	1.03a	0.511687	0.74b	0.884745	1.37c
	0.814131		0.819794		1.02337
	0.775572		0.780967		1.43727
	—		0.477421		1.69741
	—		0.634342		1.40769
	—		0.401461		1.20025
	1.25122		0.878633		1.52979
	1.1355		1.03049		1.56193
	1.37872		1.10445		1.58374
DoSUT04	0.808508	1.03a	0.511687	0.74b	0.884745	1.37c
	0.814131		0.819794		1.02337
	0.775572		0.780967		1.43727
	—		0.477421		1.69741
	—		0.634342		1.40769
	—		0.401461		1.20025
	1.25122		0.878633		1.52979
	1.1355		1.03049		1.56193
	1.37872		1.10445		1.58374
DoSUT05	1.01006	1.03a	1.06765	1.67b	0.396239	0.35c
	1.21794		1.20117		0.410213
	1.12073		1.72243		0.484458
	0.729229		0.923027		0.410213
	0.982442		1.27849		0.439655
	0.643693		0.962224		0.380098
	1.20117		2.62887		0.230757
	0.873237		2.32051		0.212339
	1.49946		2.93721		0.229163
DoSUT06	0.897095	0.98a	0.000251585	0.00b	0.000650273	0.00c
	0.890899		0.000325137		0.00071159
	1.11987		0.000414406		0.000741808
	1.24258		0.000233116		0.00071159
	1.0163		0.000253335		0.00044415
	0.703847		0.000223619		0.000598373
	—		—		0.000311892
	—		—		0.000386655
	—		—		0.000370904
DoSUT07	0.889527	1.01a	0.197663	0.29b	0.211849	0.24c
	1.01474		0.230224		0.251933
	1.33896		0.327851		0.341773
	0.960003		0.337068		0.387189
	0.889527		0.341773		0.259016
	0.871221		0.327851		0.303783
	0.973404		—		0.125966
	1.05783		—		0.133149
	1.08006		—		0.162793
DoSUT08	—	1.78a	0.367717	0.56b	0.983957	1.01c
	—		0.329116		0.97716
	—		0.443396		1.13027
	2.43964		—		1.05458
	2.45661		—		1.01866
	2.45661		—		0.66742
	1.26284		0.66281		1.17013
	1.03288		0.695762		0.990801
	1.04729		0.868541		1.10701
a, b, c represent mean values for flower, root, and stem, respectively.
